# Supplementary material for: Gamma-aminobutyric acid elicits H2O2 signalling and promotes wheat seed germination under combined salt and heat stress
Source: PeerJ. 2024 Sep 18;12:e17907. doi: 10.7717/peerj.17907 (PMC11416083; doi:10.7717/peerj.17907)
Supplement: Supplemental Information 1 — Effects of heat stress (A), salinity (B), combined stress of salinity and heat stress (C), and GABA (D) on final germination rate of wheat seeds. Bars represent standard deviation of the mean (n = 3); means associated with the same letter are not significantly different (p < 0.05). GABA, γ-aminobutyric acid. [file peerj-12-17907-s001.xlsx]

## Sheet: Figure2
Supplementary information-Figure2
Figure 2	(a)	0 mM NaCl	Sampling time point	Germination rate (%)
		Temperature (°C)		repeat 1	repeat 2	repeat 3	repeat 4	repeat 5	Means	±SD
		20	72h	89	91	91	88	89	89.6	1.34164
		25	72h	98	96	97	97	95	96.6	1.14018
		30	72h	62	63	64	65	62	63.2	1.30384
		35	72h	15	14	17	15	16	15.4	1.14018
Figure 2	(b)	20°C	Sampling time point	Germination rate (%)
		Salinity (mM)		repeat 1	repeat 2	repeat 3	repeat 4	repeat 5	Means	±SD
		0	72h	92	91	90	90	89	90.4	1.14018
		50	72h	94	96	96	95	96	95.4	0.894427
		100	72h	60	60	59	62	61	60.4	1.14018
		200	72h	24	27	24	25	26	25.2	1.30384
Figure 2	(c)	Treatment combination	Sampling time point	Germination rate (%)
				repeat 1	repeat 2	repeat 3	repeat 4	repeat 5	Means	±SD
		50 mM NaCl+20°C	72h	94	96	97	95	96	95.6	1.14018
		50 mM NaCl+25°C	72h	79	79	80	81	80	79.8	0.83666
		50 mM NaCl+30°C	72h	22	20	21	21	22	21.2	0.83666
		50 mM NaCl+35°C	72h	4	3	4	3	3	3.4	0.547723
Figure 2	(d)	20°C	Sampling time point	Germination rate (%)
		GABA treatment concentrations (mM)		repeat 1	repeat 2	repeat 3	repeat 4	repeat 5	Means	±SD
		0	72h	91	90	90	90	89	90	0.707107
		0.2	72h	95	95	93	96	96	95	1.22474
		2	72h	94	96	96	97	98	96.2	1.48324
		10	72h	94	94	96	97	96	95.4	1.34164
