# Supplementary material for: Gamma-aminobutyric acid elicits H2O2 signalling and promotes wheat seed germination under combined salt and heat stress
Source: PeerJ. 2024 Sep 18;12:e17907. doi: 10.7717/peerj.17907 (PMC11416083; doi:10.7717/peerj.17907)
Supplement: Supplemental Information 3 — Effects of GABA and combined stress (30 °C + 50 mM NaCl) on H2O2 content (A), ABA content (B), GABA content (C), GAD activities (D), and NOX activities (E) in germinated wheat seeds and sprouts within the first 22 h. Bars represent standard deviation of the mean (n = 3); means associated with the same letter are not significantly different (p < 0.05). GABA, γ-aminobutyric acid; ABA, abscisic acid; GAD, glutamic decarboxylase. [file peerj-12-17907-s003.xlsx]

## Sheet: Figure4
Supplementary information-Figure4
Figure 4	(a)	Treatment combination	Sampling time point	H2O2 content (nmol g-1 DW)
				repeat 1	repeat 2	repeat 3	repeat 4	repeat 5	Means	±SD
		0 mM NaCl+20°C	2h	443.814	482.098	443.91	463.218	492.845	465.177	22.1604
			6h	412.921	447.018	415.235	434.818	415.943	425.187	15.0358
			10h	351.612	345.065	359.837	346.872	387.658	358.209	17.4263
			14h	328.715	315.873	314.067	314.678	338.907	322.448	11.0002
			18h	280.017	278.573	254.757	282.381	281.28	275.402	11.6278
			22h	221.001	214.098	185.65	220.244	229.642	214.127	16.8547
		50 mM NaCl+30°C	2h	202.143	193.651	178.027	175.118	176.568	185.101	12.1042
			6h	196.895	205.734	203.77	223.844	194.1	204.869	11.6357
			10h	222.796	218.556	217.395	198.211	217.614	214.914	9.58939
			14h	232.962	213.019	207.76	235.209	234.573	224.705	13.2248
			18h	184.23	160.013	174.607	169.663	200.322	177.767	15.3408
			22h	157.909	146.983	149.903	146.501	125.322	145.324	12.0786
		50 mM NaCl+30°C+GABA	2h	377.977	379.989	336.469	400.518	392.956	377.582	24.7924
			6h	363.4	326.493	356.023	385.217	345.104	355.247	21.7655
			10h	323.417	303.241	322.26	327.308	299.921	315.229	12.6533
			14h	302.507	275.95	267.722	293.009	296.687	287.175	14.697
			18h	213.725	225.604	239.048	206.844	236.227	224.29	13.9463
			22h	184.628	208.49	192.13	202.976	170.331	191.711	15.1318
Figure 4	(b)	Treatment combination	Sampling time point	ABA content (nmol g-1 DW)
				repeat 1	repeat 2	repeat 3	repeat 4	repeat 5	Means	±SD
		0 mM NaCl+20°C	2h	59.697	56.261	54.054	54.047	53.812	55.5742	2.51087
			6h	37.306	34.031	39.561	38.632	38.016	37.5092	2.11344
			10h	24.488	26.694	26.913	29.39	26.357	26.7684	1.75134
			14h	22.723	22.144	22.073	21.734	19.471	21.629	1.25769
			18h	17.019	16.692	14.644	16.897	18.795	16.8094	1.47453
			22h	10.673	12.804	11.956	13.451	13.152	12.4072	1.11946
		50 mM NaCl+30°C	2h	92.783	83.929	90.995	88.427	92.618	89.7504	3.69489
			6h	75.109	70.472	72.013	73.254	75.725	73.3146	2.16842
			10h	66.747	64.692	62.801	63.719	65.257	64.6432	1.50441
			14h	65.864	67.025	65.087	66.676	64.166	65.7636	1.1666
			18h	60.541	64.139	61.912	61.931	62.058	62.1162	1.28961
			22h	53.213	55.461	54.356	55.037	52.782	54.1698	1.15058
		50 mM NaCl+30°C+GABA	2h	68.232	64.145	67.117	72.237	67.249	67.796	2.91559
			6h	52.482	47.238	52.724	52.579	57.381	52.4808	3.59053
			10h	41.856	42.604	45.794	39.413	43.297	42.5928	2.31288
			14h	37.374	38.558	36.781	36.805	34.295	36.7626	1.55631
			18h	35.812	33.963	31.296	33.355	33.78	33.6412	1.61377
			22h	28.288	28.458	29.191	27.922	25.583	27.8884	1.36902
Figure 4	(c)	Treatment combination	Sampling time point	GABA content (ng g-1 FW)
				repeat 1	repeat 2	repeat 3	repeat 4	repeat 5	Means	±SD
		0 mM NaCl+20°C	2h	3.093	3.49	3.469	3.286	2.904	3.2484	0.250604
			6h	5.104	4.964	4.705	4.76	4.534	4.8134	0.223492
			10h	5.182	4.753	5.083	5.474	5.367	5.1718	0.279647
			14h	6.143	6.028	6.348	6.682	5.797	6.1996	0.335212
			18h	7.607	7.833	7.967	7.953	7.488	7.7696	0.213518
			22h	9.214	8.884	9.37	9.619	9.273	9.272	0.266422
		50 mM NaCl+30°C	2h	1.519	1.418	1.478	1.522	1.671	1.5216	0.0934896
			6h	1.714	1.474	1.786	1.689	1.715	1.6756	0.118361
			10h	2.129	1.746	1.851	1.876	2.039	1.9282	0.153687
			14h	2.397	2.115	2.269	2.192	2.548	2.3042	0.171519
			18h	2.515	2.617	2.602	2.288	2.493	2.503	0.131592
			22h	2.384	2.616	2.604	2.595	2.825	2.6048	0.156095
		50 mM NaCl+30°C+GABA	2h	1.981	2.393	2.288	2.472	2.517	2.3302	0.213698
			6h	2.489	2.574	2.917	3.071	2.812	2.7726	0.240477
			10h	3.452	3.124	3.811	3.761	3.569	3.5434	0.27562
			14h	3.783	4.384	4.11	4.132	4.629	4.2076	0.317892
			18h	5.141	4.362	5.339	4.782	4.882	4.9012	0.372319
			22h	4.989	5.703	5.743	5.669	5.879	5.5966	0.348899
Figure 4	(d)	Treatment combination	Sampling time point	GAD activity (U g-1 protein)
				repeat 1	repeat 2	repeat 3	repeat 4	repeat 5	Means	±SD
		0 mM NaCl+20°C	2h	0.479	0.502	0.525	0.575	0.585	0.5332	0.0458498
			6h	0.746	0.818	0.844	0.918	0.944	0.854	0.0794607
			10h	1.595	1.687	1.729	1.751	1.946	1.7416	0.128937
			14h	2.322	2.339	2.341	2.481	2.615	2.4196	0.12664
			18h	2.332	2.123	1.902	2.126	2.117	2.12	0.152087
			22h	1.897	1.831	2.042	1.866	2.087	1.9446	0.113041
		50 mM NaCl+30°C	2h	0.114	0.101	0.102	0.225	0.119	0.1322	0.0524471
			6h	0.171	0.173	0.227	0.234	0.283	0.2176	0.0468914
			10h	0.195	0.226	0.242	0.279	0.312	0.2508	0.0456804
			14h	0.287	0.31	0.325	0.381	0.402	0.341	0.0486158
			18h	0.335	0.339	0.376	0.4	0.455	0.381	0.0493508
			22h	0.247	0.298	0.303	0.312	0.387	0.3094	0.0502325
		50 mM NaCl+30°C+GABA	2h	0.262	0.279	0.346	0.357	0.38	0.3248	0.0514169
			6h	0.394	0.462	0.512	0.568	0.59	0.5052	0.079707
			10h	1.061	1.155	1.195	1.34	1.464	1.243	0.159234
			14h	1.408	1.577	1.621	1.714	1.848	1.6336	0.163317
			18h	1.847	2.021	1.873	1.776	1.752	1.8538	0.105814
			22h	1.398	1.53	1.558	1.643	1.699	1.5656	0.115327
Figure 4	(e)	Treatment combination	Sampling time point	NOX activity (U g-1 protein)
				repeat 1	repeat 2	repeat 3	repeat 4	repeat 5	Means	±SD
		0 mM NaCl+20°C	2h	5.624	5.792	6.317	5.344	5.513	5.718	0.372496
			6h	13.945	13.864	11.687	12.926	13.621	13.2086	0.940351
			10h	19.648	16.94	17.427	17.113	18.147	17.855	1.10353
			14h	21.372	22.119	22.778	20.457	20.504	21.446	1.01219
			18h	18.616	20.645	19.989	19.144	19.126	19.504	0.805936
			22h	18.286	16.942	17.119	18.214	18.445	17.8012	0.711255
		50 mM NaCl+30°C	2h	0.842	0.785	1.424	1.625	1.678	1.2708	0.428547
			6h	2.578	2.113	2.481	1.943	2.045	2.232	0.280343
			10h	2.945	2.037	1.886	2.654	2.811	2.4666	0.47546
			14h	3.045	2.467	2.857	3.315	2.492	2.8352	0.363338
			18h	3.212	2.545	3.624	3.415	2.479	3.055	0.517176
			22h	3.124	3.133	2.261	2.577	2.542	2.7274	0.38611
		50 mM NaCl+30°C+GABA	2h	5.014	4.124	4.112	3.652	4.567	4.2938	0.516507
			6h	8.711	9.245	8.413	9.801	8.388	8.9116	0.605225
			10h	12.878	10.154	11.526	12.178	10.514	11.45	1.13255
			14h	13.213	11.418	13.723	11.486	13.917	12.7514	1.21397
			18h	9.415	11.615	11.015	10.724	10.776	10.709	0.805236
			22h	9.047	8.42	7.352	7.686	8.654	8.2318	0.698242
