# Supplementary material for: Gamma-aminobutyric acid elicits H2O2 signalling and promotes wheat seed germination under combined salt and heat stress
Source: PeerJ. 2024 Sep 18;12:e17907. doi: 10.7717/peerj.17907 (PMC11416083; doi:10.7717/peerj.17907)
Supplement: Supplemental Information 4 — Effects of temperature and salinity (50 mM NaCl) alone and in combination on activities of SOD (A) and CAT (B), and expression levels of MnSOD (C) and CAT (D) in germinated wheat seeds and sprouts within the first 22 h. Bars represent standard deviation of the mean (n = 3); means associated with the same letter are not significantly different (p < 0.05). GABA, γ-aminobutyric acid; SOD, superoxide dismutase; CAT, catalase. [file peerj-12-17907-s004.xlsx]

## Sheet: Figure5
Supplementary information-Figure5
Figure 5	(a)	Treatment combination	Sampling time point	SOD activity (U mg-1 protein)
				repeat 1	repeat 2	repeat 3	repeat 4	repeat 5	Means	±SD
		0 mM NaCl+20°C	8h	21.305	22.363	22.811	23.175	25.344	22.9996	1.48656
			16h	35.363	36.632	36.933	35.805	39.791	36.9048	1.73148
		50 mM NaCl+20°C	8h	27.259	26.569	24.994	27.309	27.672	26.7606	1.06506
			16h	40.626	41.433	42	39.567	40.588	40.8428	0.925613
		0 mM NaCl+30°C	8h	14.018	12.483	14.34	15.381	13.914	14.0272	1.0402
			16h	17.525	18.281	17.313	17.168	19.65	17.9874	1.02353
		50 mM NaCl+30°C	8h	7.064	7.921	7.799	8.921	7.851	7.9112	0.662147
			16h	10.6	11.579	9.68	11.711	11.248	10.9636	0.836367
		50 mM NaCl+30°C+GABA	8h	16.848	16.354	15.511	17.425	19.368	17.1012	1.44865
			16h	25.17	29.246	26.542	29.431	29.521	27.982	2.00292
Figure 5	(b)	Treatment combination	Sampling time point	CAT activity (umol min-1 mg-1 protein)
				repeat 1	repeat 2	repeat 3	repeat 4	repeat 5	Means	±SD
		0 mM NaCl+20°C	8h	18.436	16.37	16.773	16.069	17.56	17.0416	0.959457
			16h	27.84	27.204	28.614	29.598	26.984	28.048	1.07361
		50 mM NaCl+20°C	8h	20.174	19.165	21.057	19.787	19.682	19.973	0.704911
			16h	31.752	29.649	31.318	30.294	32.021	31.0068	1.00405
		0 mM NaCl+30°C	8h	11.38	12.008	10.9	10.995	9.28	10.9126	1.01127
			16h	17.374	14.94	17.927	17.353	17.242	16.9672	1.16411
		50 mM NaCl+30°C	8h	4.862	5.977	5.923	5.575	6.212	5.7098	0.52583
			16h	6.697	7.14	6.271	7.11	7.619	6.9674	0.508133
		50 mM NaCl+30°C+GABA	8h	14.979	14.691	14.003	13.764	12.992	14.0858	0.785952
			16h	20.59	23.356	23.622	23.736	23.386	22.938	1.32223
Figure 5	(c)	Treatment combination	Sampling time point	MnSOD expression level (fold)
				repeat 1	repeat 2	repeat 3	Means	±SD	CV
		0 mM NaCl+20°C	8h	3.65842	3.93873	3.82371	3.80695	0.140903	0.037012
			16h	5.39758	5.25663	5.42492	5.35971	0.0903121	0.0168502
		50 mM NaCl+20°C	8h	4.46275	4.28793	4.26972	4.34013	0.106581	0.0245572
			16h	6.25461	6.38855	6.39261	6.34525	0.0785309	0.0123763
		0 mM NaCl+30°C	8h	1.31313	1.41934	1.22385	1.31877	0.0978685	0.0742119
			16h	1.66069	1.4905	1.47388	1.54169	0.103393	0.0670646
		50 mM NaCl+30°C	8h	0.950159	0.696706	0.819779	0.822215	0.126744	0.15415
			16h	0.915929	0.986043	0.790246	0.897406	0.0992037	0.110545
		50 mM NaCl+30°C+GABA	8h	1.97986	2.06415	1.85129	1.9651	0.107196	0.0545501
			16h	2.21023	2.40217	2.2132	2.2752	0.109967	0.0483329
Figure 5	(d)	Treatment combination	Sampling time point	CAT expression level (fold)
				repeat 1	repeat 2	repeat 3	Means	±SD	CV
		0 mM NaCl+20°C	8h	2.53054	2.71633	2.69258	2.64648	0.101107	0.0382044
			16h	3.00077	3.07546	3.21633	3.09752	0.109456	0.0353368
		50 mM NaCl+20°C	8h	3.56122	3.36491	3.4984	3.47484	0.100256	0.0288519
			16h	4.2747	4.36634	4.38743	4.34282	0.0599306	0.0137999
		0 mM NaCl+30°C	8h	1.07849	1.24261	1.02122	1.11411	0.114913	0.103143
			16h	1.27579	1.4276	1.4607	1.38803	0.0986012	0.0710368
		50 mM NaCl+30°C	8h	0.409232	0.39863	0.3788	0.395554	0.0154471	0.0390519
			16h	0.813135	0.613387	0.730996	0.719173	0.100398	0.139601
		50 mM NaCl+30°C+GABA	8h	1.7179	1.91262	1.78129	1.80394	0.0993142	0.0550541
			16h	2.04707	1.91262	2.10716	2.02228	0.0996101	0.0492563
