# Supplementary material for: Gamma-aminobutyric acid elicits H2O2 signalling and promotes wheat seed germination under combined salt and heat stress
Source: PeerJ. 2024 Sep 18;12:e17907. doi: 10.7717/peerj.17907 (PMC11416083; doi:10.7717/peerj.17907)
Supplement: Supplemental Information 5 [file peerj-12-17907-s005.xls]

## Sheet: Sheet1
ITEM TO CHECK	IMPORTANCE	CHECKLIST
EXPERIMENTAL DESIGN
Definition of experimental and control groups	E	Please refer to lines 198-201 of the original manuscript for details
Number within each group	E	Please refer to lines 201-202 of the original manuscript for details
Assay carried out by core lab or investigator's lab?	D
Acknowledgement of authors' contributions	D
SAMPLE
Description	E	Seeds collected from the different groups were immediately placed in liquid nitrogen and then stored in a laboratory freezer at -80°C pending RNA extraction.
Volume/mass of sample processed	D
Microdissection or macrodissection	E
Processing procedure	E
If frozen - how and how quickly?	E
If fixed - with what, how quickly?	E
Sample storage conditions and duration (especially for FFPE samples)	E
NUCLEIC ACID EXTRACTION
Procedure and/or instrumentation	E	For total RNA extraction, first, the mortar, pestle, forceps, pipette tips, and centrifuge tubes were wrapped in aluminum foil and then sterilized in an oven at 150°C for 2-5 h, followed by autoclaving at 121°C for 20 min. The mortar and pestle were pre-cooled with liquid nitrogen and 100 mg of seed tissue was ground to a fine powder for each treatment. The ground tissue was then transferred into…
Name of kit and details of any modifications	E
Source of additional reagents used	D
Details of DNase or RNAse treatment	E	4× DNA Master Mix 2µL, RNA template (0.5 pg-0.5µg, 1µL), add RNase-free H2O to bring to 8µL.
Contamination assessment (DNA or RNA)	E	Please refer to Supplementary Material Figure 1 and Figure 2 of MIQE for details
Nucleic acid quantification	E	Please refer to Supplementary Material Figure 2 of MIQE for details
Instrument and method	E	Assessment of RNA integrity and concentration by 1% denaturing agarose gel electrophoresis
Purity (A260/A280)	D
Yield	D
RNA integrity method/instrument	E	Detection of RNA quality using Nanodrop OoneC (Thermo Fisher Scientific, Waltham, MA, USA)
RIN/RQI or Cq of 3' and 5' transcripts	E	Please refer to Supplementary Material Figure 1 of MIQE for details
Electrophoresis traces	D
Inhibition testing (Cq dilutions, spike or other)	E	Please refer to Supplementary Material Figure 4 and Figure 5 of MIQE for details
REVERSE TRANSCRIPTION		0
Complete reaction conditions	E	cDNA Reverse Transcription: Using ReverTra-AceTM-qPCR-RT-Master Mix (TOYOBO Co: 2µL of 4×DNA Master Mix, RNA template (0.5 pg-0.5µg in 1µL), the mixture was incubated at 37°C for 5 minutes. Subsequent reactions were performed on ice as follows: 2µL of 4×DNA Master Mix, RNA template (0.5 pg-0.5µg in 1µL), add RNase-free H2O to 8µL and incubate the mixture at 37°C for 5 minutes. The mixture was the…
Amount of RNA and reaction volume	E
Priming oligonucleotide (if using GSP) and concentration	E
Reverse transcriptase and concentration	E
Temperature and time	E
Manufacturer of reagents and catalogue numbers	D
Cqs with and without RT	D*
Storage conditions of cDNA	D
qPCR TARGET INFORMATION
If multiplex, efficiency and LOD of each assay.	E	We do not have multiple detections for a single trial
Sequence accession number	E	Please refer to Supplementary Material Table 1 of MIQE for details
Location of amplicon	D
Amplicon length	E	MnSOD:156, CAT: 103, Actin : 176, CJ705892: 116
In silico specificity screen (BLAST, etc)	E	Please refer to Supplementary Material Figure 3 of MIQE for details
Pseudogenes, retropseudogenes or other homologs?	D
Sequence alignment	D
Secondary structure analysis of amplicon	D
Location of each primer by exon or intron (if applicable)	E	MnSOD(exon：389-525), CAT(exon：1644-1727) , Actin(exon：754-910), CJ705892(exon：1578-1674)
What splice variants are targeted?	E	MnSOD(XM_044603645.1),CAT(NM_001405704.1 )
qPCR OLIGONUCLEOTIDES
Primer sequences	E	Please refer to Supplementary Material Table 1 of MIQE for details
RTPrimerDB Identification Number	D
Probe sequences	D**
Location and identity of any modifications	E	Non probe method
Manufacturer of oligonucleotides	D	Seven Innovation (Beijing)Biological Technology Co.,Ltd
Purification method	D	Primer purification method: PAGE
qPCR PROTOCOL
Complete reaction conditions	E	The expression patterns of the two antioxidant enzymes were analyzed by quantitative real-time polymerase chain reaction (qRT-PCR) using a Bio-Rad Laboratories Inc., Hercules, CA, USA 2.423 instrument with a CFX96 TouchTM Real-Time PCR Detection System (Bio Rad, Hercules, California, USA) and a SYBR Premix Ex-Taq II Kit kit ( Takara, Dalian, China), the expression patterns of the two antioxidant …
Reaction volume and amount of cDNA/DNA	E
Primer, (probe), Mg++ and dNTP concentrations	E
Polymerase identity and concentration	E
Buffer/kit identity and manufacturer	E
Exact chemical constitution of the buffer	D
Additives (SYBR Green I, DMSO, etc.)	E
Manufacturer of plates/tubes and catalog number	D
Complete thermocycling parameters	E	The reaction conditions were 95°C for 60 seconds (pre-denaturation), 95°C for 15 seconds (denaturation), 55°C for 30 seconds (annealing), and 72°C for 60 seconds (extension), set up for 40 cycles, and finally held at 4°C.
Reaction setup (manual/robotic)	D
Manufacturer of qPCR instrument	E	Please refer to lines 215-216 of the original manuscript for details
qPCR VALIDATION
Evidence of optimisation (from gradients)	D
Specificity (gel, sequence, melt, or digest)	E	Please refer to Supplementary Material Figure 10 of MIQE for details
For SYBR Green I, Cq of the NTC	E	No signal detected in NTC
Standard curves with slope and y-intercept	E	Please refer to Supplementary Material Figure 6 of MIQE for details
PCR efficiency calculated from slope	E	Actin: 98.5%, CJ705892: 95.3%, MnSOD: 108.3%, CAT: 107.6%
Confidence interval for PCR efficiency or standard error	D
r2 of standard curve	E	Actin R2: 0.9883, CJ705892 R2: 0.996, MnSOD R2: 0.9848, CAT R2: 0.9774
Linear dynamic range	E	Please refer to Supplementary Material Figure 7of MIQE for details
Cq variation at lower limit	E
Confidence intervals throughout range	D
Evidence for limit of detection	E	Please refer to Supplementary Material Figure 7-10 of MIQE for details
If multiplex, efficiency and LOD of each assay.	E	We do not have multiple detections for a single trial
DATA ANALYSIS
qPCR analysis program (source, version)	E	CFX96 Real time Fluorescence Quantitative PCR Detection System (Bio Rad, Hercules, California, USA)
Cq method determination	E	The threshold cycle (Cq) value is automatically determined by the analysis software (CFX96 real-time fluorescence quantitative PCR detection system (Bio Rad, Hercules, California, USA)). The software uses an automatic algorithm to determine the threshold based on the exponential amplification stage of the amplification curve.
Outlier identification and disposition	E	Each processed and repeated Cq value is controlled within ± 2
Results of NTCs	E	NTC result is 0
Justification of number and choice of reference genes	E	Two reference genes. Validation of the internal reference genes between two wheat varieties showed that actinwas the most stable. Please refer to Supplementary Material Figure 11 of MIQE for details
Description of normalisation method	E	Based on amplification efficiency and using 2-∆∆Ct to measure relative gene expression levels, each treatment has 3 biological replicates.
Number and concordance of biological replicates	D
Number and stage (RT or qPCR) of technical replicates	E	3 biological replicates, 3 technical replicates
Repeatability (intra-assay variation)	E	Please refer to Supplementary Data Sheet 4 for details
Reproducibility (inter-assay variation, %CV)	D
Power analysis	D
Statistical methods for result significance	E	Please refer to lines 226-228 of the original manuscript for details
Software (source, version)	E
Cq or raw data submission using RDML	D
Table 1. MIQE checklist for authors, reviewers and editors. All essential information (E) must be submitted with the manuscript. Desirable
information (D) should be submitted if available. If using primers obtained from RTPrimerDB, information on qPCR target, oligonucleotides,
protocols and validation is available from that source.
*: Assessing the absence of DNA using a no RT assay is essential when first extracting RNA. Once the sample has been validated as
RDNA-free, inclusion of a no-RT control is desirable, but no longer essential.
**: Disclosure of the probe sequence is highly desirable and strongly encouraged. However, since not all commercial pre-designed assay
vendors provide this information, it cannot be an essential requirement. Use of such assays is advised against.
